# Supplementary material
Source: publisher figshare collection journal article supplement (https://asha.figshare.com/articles/dataset/_/14963550)
Supplement: Supplementary file 1 [file 1]

**Supplemental Material S3.** Summary of false positive judgments: production errors which were judged as being correct

| ID | Total false positives:<br>error not identified |    | Distortion |    | Phoneme boundary crossed <sup>a</sup> |    | Phoneme boundary crossed with distortion <sup>b</sup> |    | Added or deleted segments or syllables |    | Multiple errors types |    | Segment type C, V, CV |                                                 |
|----|------------------------------------------------|----|------------|----|---------------------------------------|----|-------------------------------------------------------|----|----------------------------------------|----|-----------------------|----|-----------------------|-------------------------------------------------|
|    | T1                                             | T2 | T1         | T2 | T1                                    | T2 | T1                                                    | T2 | T1                                     | T2 | T1                    | T2 | T1                    | T2                                              |
| 1  | 0                                              | 1  | 0          | 0  | 0                                     | 1  | 0                                                     | 0  | 0                                      | 0  | 0                     | 0  | 0                     | 1 V                                             |
| 2  | 2                                              | 1  | 0          | 0  | 0                                     | 1  | 0                                                     | 0  | 0                                      | 0  | 2                     | 0  | 5 C                   | 1 C                                             |
| 3  | 5                                              | 7  | 0          | 1  | 0                                     | 1  | 0                                                     | 0  | 3                                      | 2  | 2                     | 3  | 6 C, 1 V              | 11 C, 1 V                                       |
| 4  | 6                                              | 8  | 3          | 2  | 2                                     | 3  | 0                                                     | 0  | 1                                      | 2  | 0                     | 1  | 6 C                   | 9 C                                             |
| 5  | 4                                              | 4  | 1          | 0  | 1                                     | 1  | 0                                                     | 0  | 2                                      | 1  | 0                     | 2  | 3 C, 1 CV             | 2 C, 3 V, 1 CV                                  |
| 6  | 0                                              | 2  | 0          | 1  | 0                                     | 1  | 0                                                     | 0  | 0                                      | 0  | 0                     | 0  | 0                     | 2 C                                             |
| 7  | 1                                              | 2  | 0          | 0  | 1                                     | 1  | 0                                                     | 0  | 0                                      | 1  | 0                     | 0  | 1 C                   | 2 C                                             |
| 8  | 1                                              | 10 | 0          | 0  | 0                                     | 1  | 0                                                     | 0  | 1                                      | 1  | 0                     | 8  | 1 VC                  | 14 C, 3 V, 2 VC, 1 CV, 3 CVC, 1 CVCVC, 1 CCVCVC |
| 9  | 2                                              | 2  | 0          | 0  | 2                                     | 2  | 0                                                     | 0  | 0                                      | 0  | 0                     | 0  | 2 C                   | 2 C                                             |
| 10 | 2                                              | 0  | 0          | 0  | 1                                     | 0  | 0                                                     | 0  | 0                                      | 0  | 1                     | 0  | 1 V, 2 C              | 0                                               |
| 11 | 3                                              | 6  | 0          | 0  | 0                                     | 1  | 2                                                     | 0  | 1                                      | 3  | 0                     | 2  | 1 V, 2 C              | 5 C, 3 V, 1 VC                                  |
| 12 | 2                                              | 1  | 0          | 1  | 1                                     | 0  | 0                                                     | 0  | 1                                      | 0  | 0                     | 0  | 1 V, 1 C              | 1 C                                             |
| 13 | 7                                              | 8  | 0          | 0  | 3                                     | 4  | 0                                                     | 0  | 1                                      | 0  | 3                     | 4  | 1 V, 10 C, 1 CV       | 14 C, 3 V                                       |
| 14 | 2                                              | 1  | 0          | 0  | 2                                     | 0  | 0                                                     | 0  | 0                                      | 0  | 0                     | 1  | 2 V                   | 1 V, 1 C                                        |
| 15 | 2                                              | 2  | 2          | 1  | 0                                     | 0  | 0                                                     | 0  | 0                                      | 0  | 0                     | 1  | 2 C                   | 2 C                                             |
| 16 | 1                                              | 2  | 0          | 0  | 0                                     | 1  | 0                                                     | 0  | 0                                      | 1  | 1                     | 0  | 2 C                   | 2 C                                             |
| 17 | 2                                              | 3  | 1          | 1  | 1                                     | 0  | 0                                                     | 0  | 0                                      | 1  | 0                     | 1  | 2 C                   | 3 C, 1 V                                        |
| 18 | 1                                              | 1  | 0          | 0  | 0                                     | 0  | 0                                                     | 1  | 0                                      | 0  | 1                     | 0  | 1 C, 1 V              | 1 C                                             |
| 19 | 0                                              | 1  | 0          | 0  | 0                                     | 1  | 0                                                     | 0  | 0                                      | 0  | 0                     | 0  | 0                     | 1 V                                             |

|    |   |                |   |   |   |   |   |   |   |   |   |   |           |                  |
|----|---|----------------|---|---|---|---|---|---|---|---|---|---|-----------|------------------|
| 20 | 8 | 6              | 1 | 0 | 3 | 5 | 0 | 0 | 1 | 0 | 3 | 1 | 10 C      | 3 C, 4 V         |
| 21 | 2 | 1              | 0 | 0 | 1 | 0 | 0 | 0 | 1 | 1 | 0 | 0 | 2 C       | 1 C              |
| 22 | 2 | 7 <sup>a</sup> | 0 | 0 | 0 | 2 | 0 | 1 | 1 | 1 | 1 | 2 | 3 C       | 7 C, 1 CV        |
| 23 | 5 | 9              | 0 | 0 | 5 | 2 | 0 | 0 | 0 | 1 | 0 | 6 | 4 C, 1 CV | 14 C, 1 CC, 2 CV |
| 24 | 6 | 6              | 2 | 2 | 2 | 3 | 0 | 1 | 1 | 0 | 1 | 0 | 6 C, 2 V  | 6 C              |

*Note.* ID = participant identifier; C = consonant; V = vowel; CV = consonant-vowel.

<sup>a</sup>Error perceived as substitution but may have been extreme distortion. <sup>b</sup>Distorted perceived substitution.

\*One false positive was not audiorecorded and error type could not be determined.
